# Supplementary material for: Self-Assessment of Preparedness among Critical Care Trainees Transitioning from Fellowship to Practice
Source: MDPI journal article supplement (doi:10.3390/healthcare7020074), 2019-05-30
Supplement: s1 [file s1]

## Supplemental Materials

### In-Training Section Research Survey

\* Required

1. 1. What is your current position: \*

Mark only one oval.

- Healthcare Non-Physician In training
- Recent Healthcare Non-Physician Graduate (1-3 years)
- Physician In Training (Clinical Fellowship, Residency, Research Fellowship)
- Physician who graduated training within the past 1-3 years (please choose most advanced training)
- Other: \_\_\_\_\_

2. 2. What is your specialty (please include all that apply)? \*

Check all that apply.

- 
- Critical Care Internal Medicine
  - Critical Care Pediatrics
  - Critical Care Neurology
  - Critical Care Surgery
  - Anesthesia– Critical Care
  - Other: \_\_\_\_\_

3. 3. Have you in the past 4 years interviewed or are you currently interviewing for a job? \*

Mark only one oval.

- Yes
- No

4. 4. What is the location of interest (if interested in more than one please include all that apply)? \*

Check all that apply.

- Northeast
- Southeast
- Northwest
- Southwest
- Northcentral
- Southcentral
- Anywhere in US
- Other: \_\_\_\_\_

5. 5. What is your job preference? \*

Mark only one oval.

- Full time academic
- Full time private practice
- Part time academic
- Part time private practice
- Other: \_\_\_\_\_

6. 6. If you have interviewed in the past 4 years, or have already scheduled your interviews, how many locations will you interview? Please offer a number otherwise please skip the question. \*

7. 7. If you interviewed in the past 4 years or will interview soon, what did you use/ or do you intend to use as a source of available jobs (please choose all that apply): \*

Check all that apply.

- SCCM site
- Direct contact (phone, email, letter) with potential employers Head hunter/recruiter
- Word of mouth
- Suggestions offered by my mentor/program director
- N/A
- Other: \_\_\_\_\_

8.8. The next questions (8–14) will be evaluated based on a Likert scale. If you interviewed in the past 4 years or will interview soon please choose the best option (otherwise please choose N/A):\*

Mark only one oval per row.

|                                                                                                                                                         | I strongly agree      | I agree               | I neither agree nor disagree | I disagree            | I strongly disagree   | N/A                   |
|---------------------------------------------------------------------------------------------------------------------------------------------------------|-----------------------|-----------------------|------------------------------|-----------------------|-----------------------|-----------------------|
| 8. I felt/feel well prepared for the interviewing process:                                                                                              | <input type="radio"/> | <input type="radio"/> | <input type="radio"/>        | <input type="radio"/> | <input type="radio"/> | <input type="radio"/> |
| 9. I felt /feel well prepared about creating an adequate portfolio for job interviews (building a CV, obtaining appropriate letters of recommendation). | <input type="radio"/> | <input type="radio"/> | <input type="radio"/>        | <input type="radio"/> | <input type="radio"/> | <input type="radio"/> |
| 10. I received formal guidance from my mentor/training program in preparing my portfolio.                                                               | <input type="radio"/> | <input type="radio"/> | <input type="radio"/>        | <input type="radio"/> | <input type="radio"/> | <input type="radio"/> |
| 11. I received guidance or help from mentor mentor/training program in searching for a position.                                                        | <input type="radio"/> | <input type="radio"/> | <input type="radio"/>        | <input type="radio"/> | <input type="radio"/> | <input type="radio"/> |
| 12. I received guidance or help from my mentor/training program in deciding what position to choose.                                                    | <input type="radio"/> | <input type="radio"/> | <input type="radio"/>        | <input type="radio"/> | <input type="radio"/> | <input type="radio"/> |
| 13. My training program facilitated my resume building throughout my training period.                                                                   | <input type="radio"/> | <input type="radio"/> | <input type="radio"/>        | <input type="radio"/> | <input type="radio"/> | <input type="radio"/> |
| 14. I consider a formal training course in job search, portfolio development and details of the interview process very useful.                          | <input type="radio"/> | <input type="radio"/> | <input type="radio"/>        | <input type="radio"/> | <input type="radio"/> | <input type="radio"/> |

9. 15. If you agree it is important to participate in a formal course in job search, portfolio development and details of the interview process, please choose all that interest you from all the following categories:

*Check all that apply.*

- Course offered by home institution
- Course at SCCM Annual Congress
- Webinar

10. 16. If you agree it is important to participate in a formal course in job search, portfolio development and details of the interview process, please indicate when this is best offered:

*Check all that apply.*

- At the beginning of training
- In the middle of training
- Towards the end of training
- Throughout training
- Independent of training

11. **17. Please choose from the following topics the ones you find most interesting and helpful for a formal course in job search, portfolio development and details of the interview process (please choose all that apply):**

*Check all that apply.*

- Understand career pathways after Critical Care Training
- Mock job Interview
- Work Life Balance
- How to obtain a dream job.
- Post interview, when is the right time to start to negotiate, and how?
- Academia vs. private practice: what is similar, what is different?
- How to build a CV and develop a portfolio.
- How to find mentorship in a new job.
- Signing the contract - money, insurance, liability, taxes

12. **18. Please choose from the following topics the ones you find most interesting as other possible topics that could be offered at SCCM Annual Congress or via Webinars:**

*Check all that apply.*

- Academic tenure and promotion
- How to obtain funding in the current era
- Tips for improving coding and billing
- Dealing with being sued
- Constructive communication and managing conflict
- Leadership vs. facilitative situational leadership

13. **Please add any suggestions in the following Free Textbox. Thank you very much for your participation!**
